# Supplementary material for: Deep learning model improves tumor-infiltrating lymphocyte evaluation and therapeutic response prediction in breast cancer
Source: NPJ Breast Cancer. 2023 Aug 30;9:71. doi: 10.1038/s41523-023-00577-4 (PMC10469174; doi:10.1038/s41523-023-00577-4)
Supplement: Supplementary file 1 — Supplementary material [file 41523_2023_577_MOESM1_ESM.pdf]

**Supplementary Table 1.** Summary of interobserver concordance of breast tumor infiltrating lymphocyte (TIL) score in previous studies and this study. The superscript ‘a’ represents ‘Concordance correlation coefficient’, ‘b’ represents ‘Cohen’s kappa’, ‘c’ represents ‘Intraclass correlation coefficient’, and ‘d’ represents ‘Squared weighted kappa’.

|                                      | Number of<br>participated<br>pathologists<br>(specialty) | Number of<br>cases | Correlation              | Agreement              |
|--------------------------------------|----------------------------------------------------------|--------------------|--------------------------|------------------------|
| Buisseret et al. <sup>11</sup>       | 3 (Breast pathologist [Br], General pathologist [Gen])   | 124                | 0.69 <sup>a</sup>        | Not available (N/A)    |
| Swisher et al. <sup>10</sup>         | 4 (Br)                                                   | 75                 | N/A                      | 0.57 <sup>b</sup>      |
| Khoury et al. <sup>25</sup>          | 2 (Br)                                                   | 100                | 0.91–0.96 <sup>c</sup>   | 0.53–0.71 <sup>d</sup> |
| Kos et al. <sup>12</sup><br>(Ring 1) | 32 (Br, Gen)                                             | 60                 | 0.70 <sup>c</sup>        | N/A                    |
| Kos et al. <sup>12</sup><br>(Ring 2) | 28 (Br, Gen)                                             | 60                 | 0.89 <sup>c</sup>        | N/A                    |
| Kos et al. <sup>12</sup><br>(Ring 3) | 6 (Br, Gen)                                              | 100                | 0.76 <sup>c</sup>        | N/A                    |
| This study<br>(Initial)              | 4 (Gen)                                                  | 402                | 0.653–0.859 <sup>a</sup> | N/A                    |
| This study<br>(Revised)              | 4 (Gen)                                                  | 192                | 0.800–0.914 <sup>a</sup> | N/A                    |

**Supplementary Table 2.** Concordance correlation coefficient values (95% confidence interval) between two pathologists in re-examined slides

|                     | Re-evaluated slides<br>with deep learning model<br>( <i>N</i> = 226) | Slides not re-evaluated<br>( <i>N</i> = 176) |
|---------------------|----------------------------------------------------------------------|----------------------------------------------|
| Pathologist A vs. B | 0.555 (0.471–0.629)                                                  | 0.759 (0.667–0.827)                          |
| Pathologist A vs. C | 0.524 (0.448–0.593)                                                  | 0.856 (0.811–0.891)                          |
| Pathologist A vs. D | 0.640 (0.487–0.755)                                                  | 0.814 (0.728–0.875)                          |
| Pathologist B vs. C | 0.709 (0.625–0.776)                                                  | 0.840 (0.773–0.888)                          |
| Pathologist C vs. D | 0.779 (0.663–0.858)                                                  | 0.810 (0.722–0.873)                          |

**Supplementary Table 3.** Training and validation dataset to development deep learning-based tissue analyzer, Lunit SCOPE IO

| Source                                                         | Primary organ | Training data |                                     |                      | Validation data |                                     |                      |
|----------------------------------------------------------------|---------------|---------------|-------------------------------------|----------------------|-----------------|-------------------------------------|----------------------|
|                                                                |               | Slide No.     | Annotated tissue (mm <sup>2</sup> ) | Annotated cell (no.) | Slide No.       | Annotated tissue (mm <sup>2</sup> ) | Annotated cell (no.) |
| Samsung Medical Center                                         | Breast        | 486           | 649.2                               | 104,447              | 71              | 111.7                               | 5,595                |
|                                                                | Lung          | 145           | 42.3                                | 14,308               | 5               | 4.0                                 | 97                   |
|                                                                | Others        | 1,572         | 513                                 | 120,730              | 173             | 154.2                               | 18,896               |
| Prostate, Lung, Colorectal, and Ovarian Cancer Screening Trial | Lung          | 238           | 329.0                               | 146,615              | 101             | 102.8                               | 4,404                |
| iSpecimen                                                      | Lung          | 199           | 650.2                               | 126,214              | 36              | 23.6                                | 942                  |
| National Lung Screening Trial                                  | Lung          | 72            | 150.9                               | 45,911               | 20              | 14.8                                | 397                  |
| Cureline                                                       | Lung          | -             | -                                   | -                    | 34              | 38.0                                | 3,176                |
|                                                                | Others        | -             | -                                   | -                    | 14              | 13.6                                | 5,383                |
| Total                                                          |               | 2,712         | 2,334.7                             | 558,225              | 454             | 462.7                               | 38,881               |

**Supplementary Table 4.** Correlation between mean tumor infiltrating lymphocyte (TIL) of pathologists and deep learning based TIL analyzer, according to the different constant  $\alpha$ . The degree of correlation is measured by concordance correlation coefficient.

| <b>TIL range (mean of pathologists)</b> | <b>Constant <math>\alpha</math></b> |                     |                     |
|-----------------------------------------|-------------------------------------|---------------------|---------------------|
|                                         | <b>6.5</b>                          | <b>7.0</b>          | <b>7.5</b>          |
| All ( $N = 171$ )                       | 0.789 (0.731–0.835)                 | 0.776 (0.719–0.823) | 0.759 (0.702–0.806) |
| $\leq 20$ ( $N = 146$ )                 | 0.660 (0.573–0.733)                 | 0.662 (0.577–0.733) | 0.658 (0.575–0.726) |
| $\leq 10$ ( $N = 122$ )                 | 0.371 (0.271–0.464)                 | 0.403 (0.296–0.500) | 0.432 (0.321–0.532) |

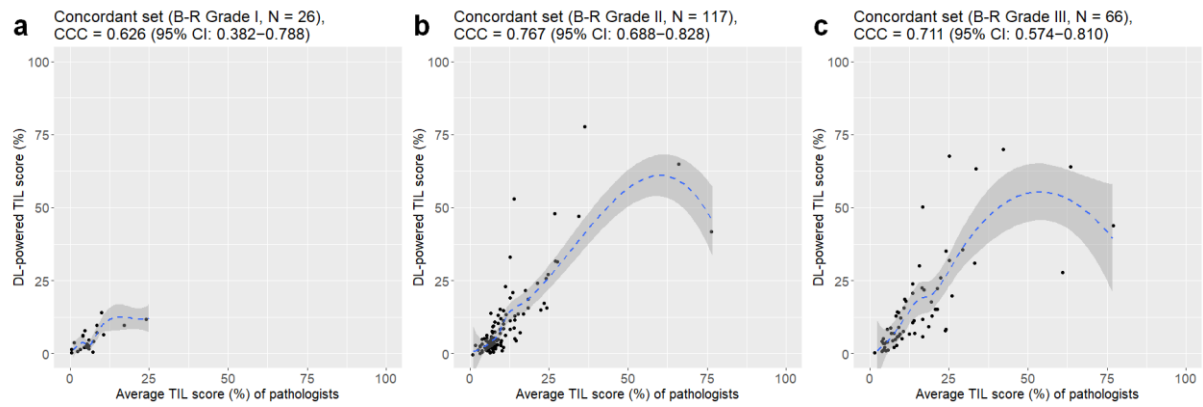

**Supplementary Fig. 1.** The concordance correlation coefficient (CCC) values between average stromal tumor infiltrating lymphocyte (sTIL) score among the pathologists and the deep learning (DL)-powered interpretation in Bloom-Richardson histologic grade I ( $N = 26$ ) (a), II ( $N = 117$ ) (b) and III ( $N = 66$ ) (c) tumors.

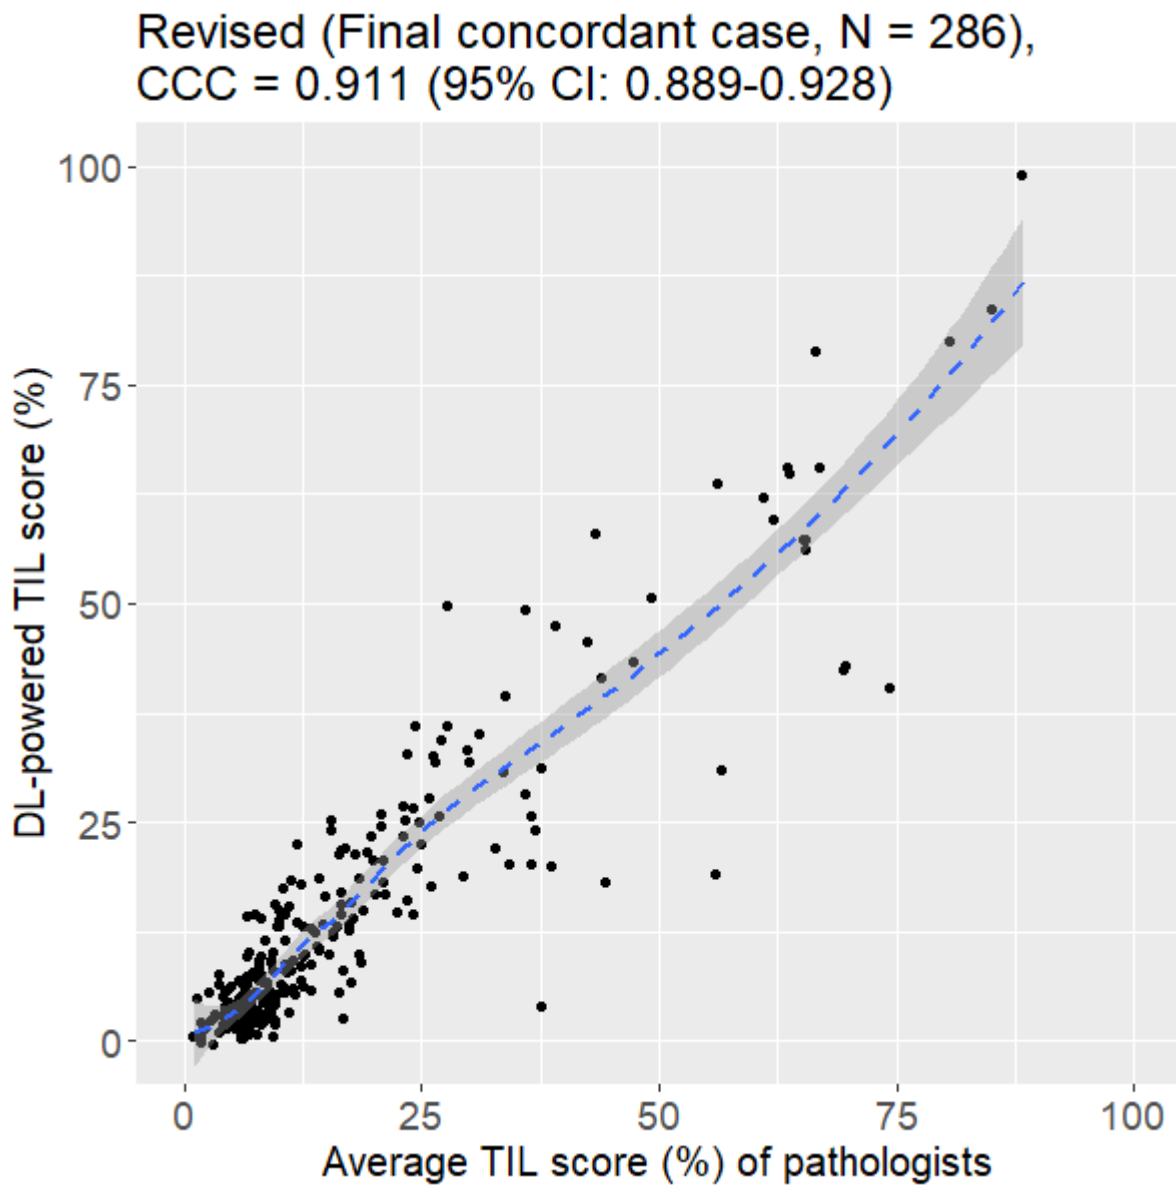

**Supplementary Fig. 2.** The standalone performance of the deep learning (DL) model in the dataset including the both initially concordant cases and the concordant cases following the DL -assisted revision, measured by concordance correlation coefficient (CCC).

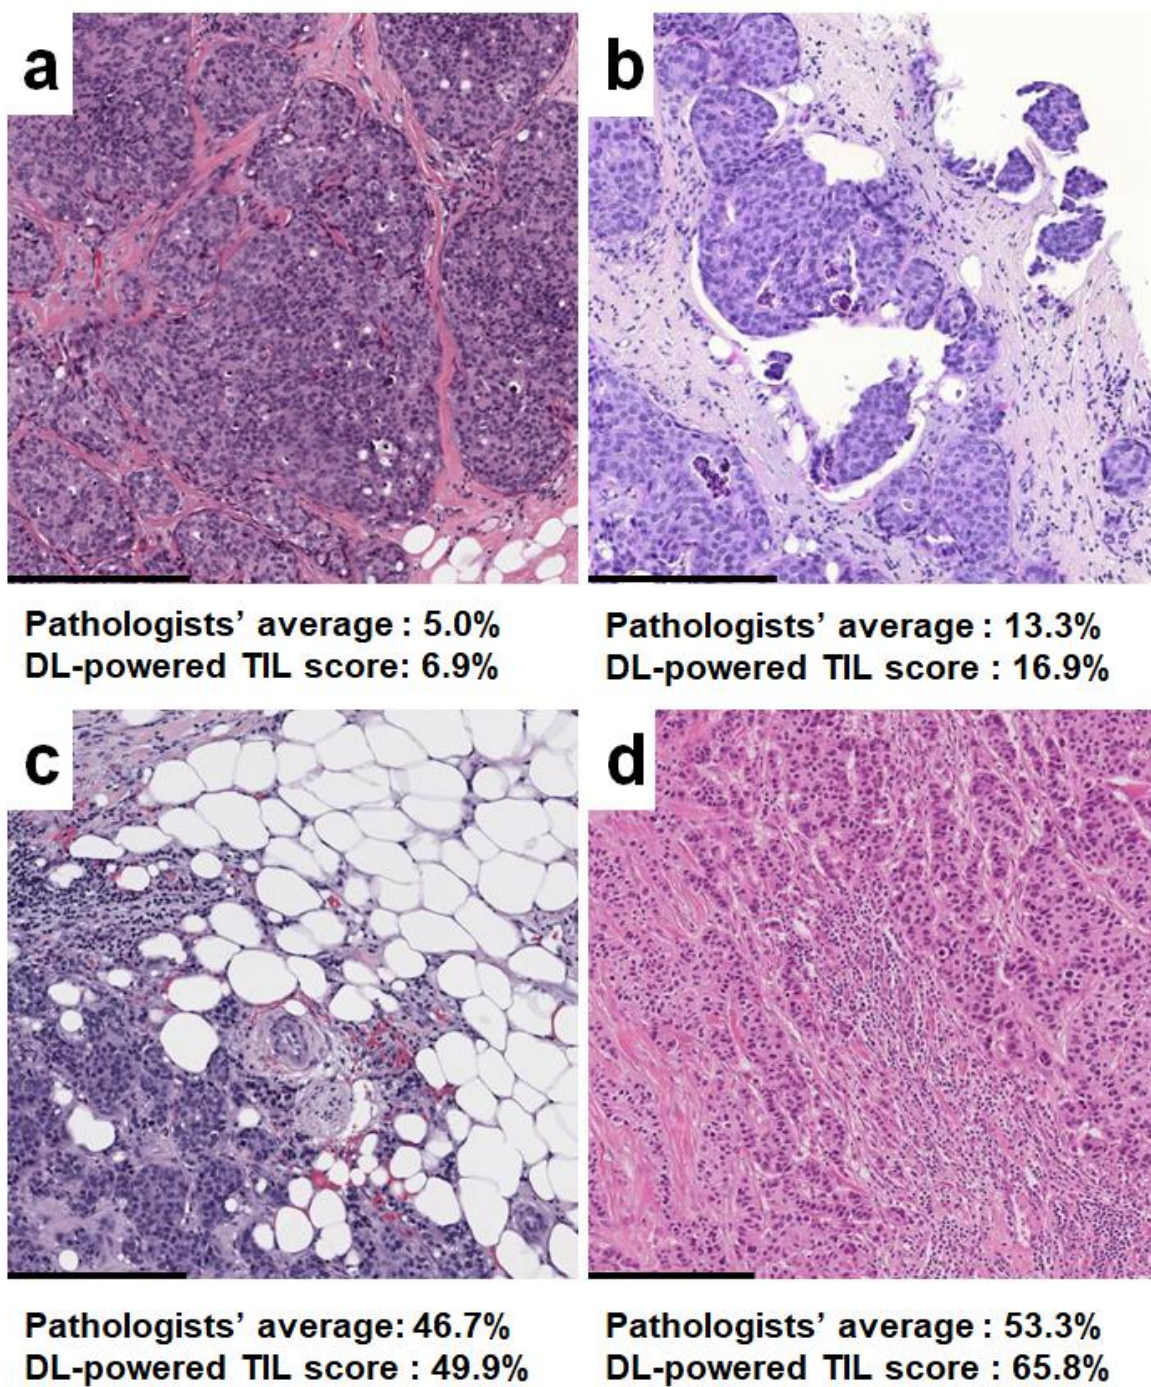

**Supplementary Fig. 3.** Representative images of stromal tumor infiltrating lymphocyte (sTIL) evaluation by pathologists and the deep learning (DL)-based TIL analyzer (scale bar, 250 $\mu$ m).

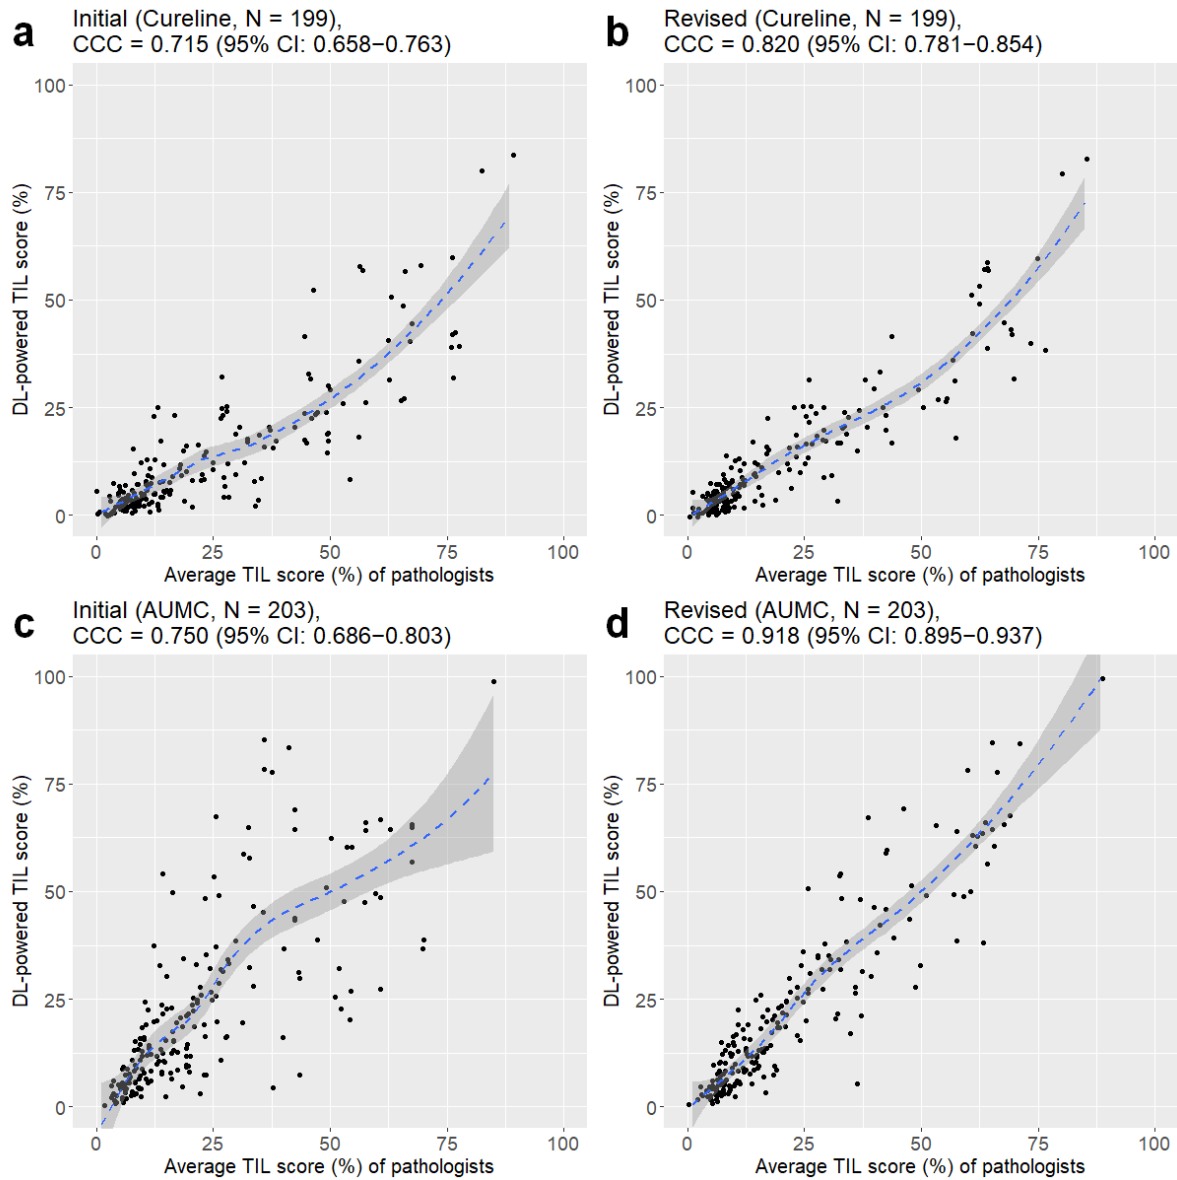

**Supplementary Fig. 4. (a-b)** The concordance correlation coefficient (CCC) values between the average sTIL score among pathologist and the deep learning (DL) interpretation in the Cureline set before **(a)** and after DL assistance **(b)**. **(c-d)** The CCC values between the average sTIL score among pathologist and the DL interpretation in the Ajou University Medical Center (AUMC) set before **(c)** and after DL assistance **(d)**.

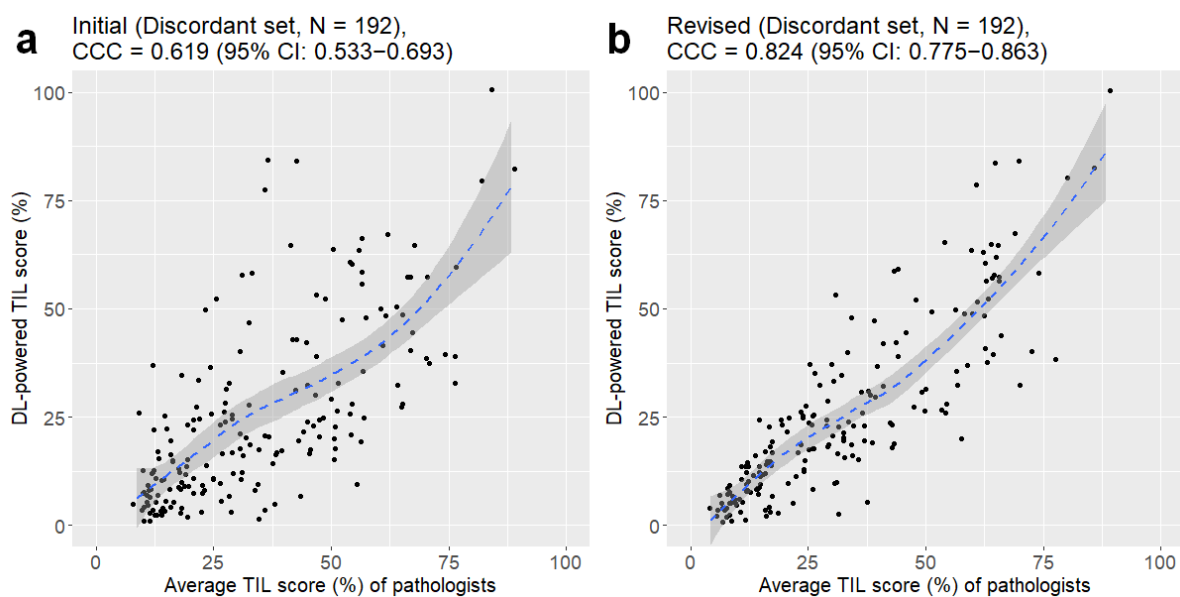

**Supplementary Fig. 5.** The concordance correlation coefficient (CCC) values between the average stromal tumor infiltrating lymphocyte (sTIL) score among pathologist and the deep learning (DL) interpretation in the initially discordant set ( $N = 169$ ). **(a)** Before DL assistance **(b)** After DL assistance.

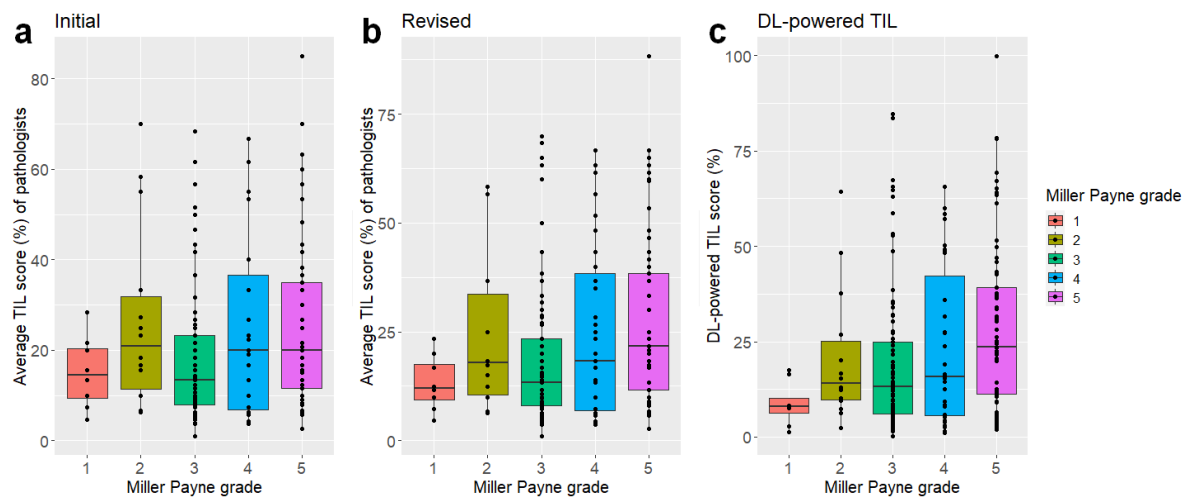

**Supplementary Fig. 6.** The average stromal tumor infiltrating lymphocyte (sTIL) score in the Miller-Payne grade subgroup evaluated by (a) initial consensus among pathologists, (b) deep learning (DL)-assisted revision consensus among pathologists, and (c) the DL model.

The center lines in the boxplot represent median values; the bounds of the boxplot represent the interquartile ranges; the whiskers represent the range of the data.

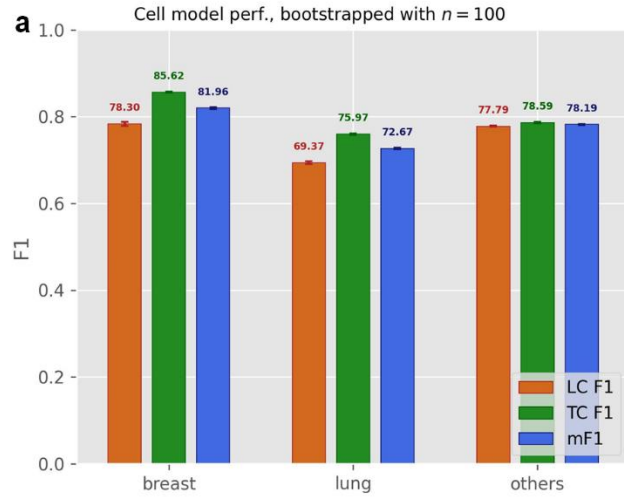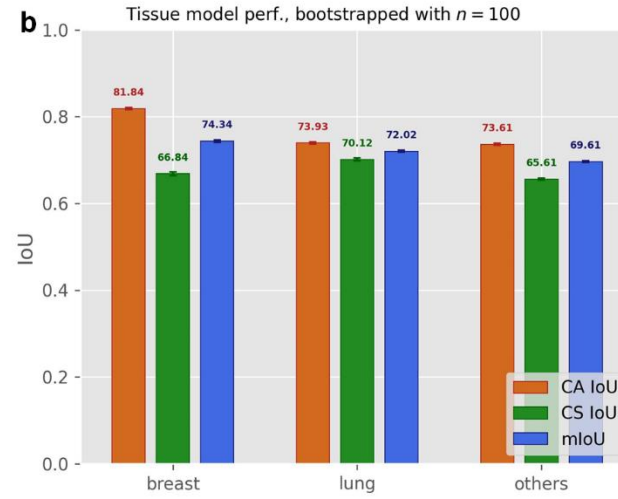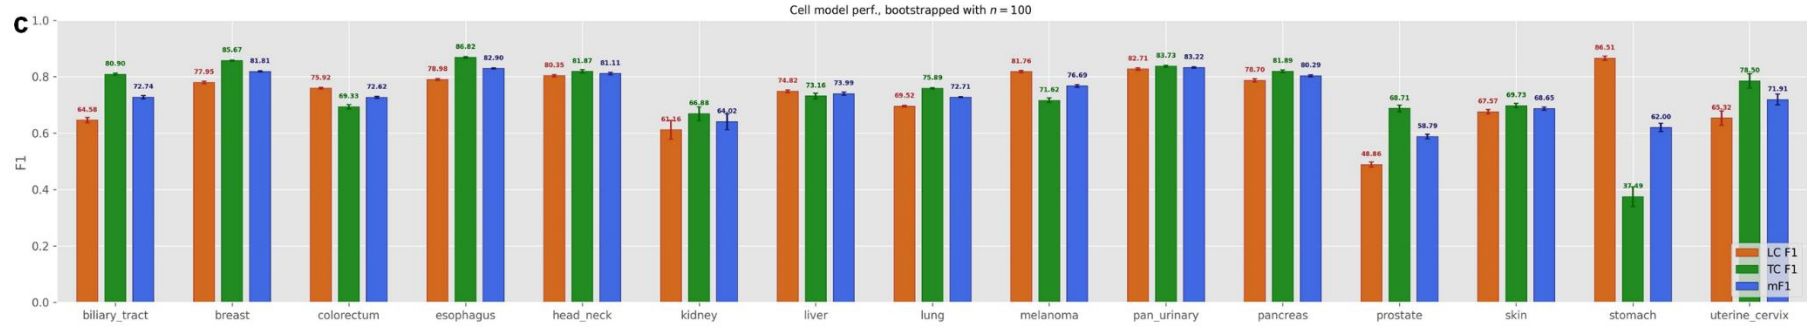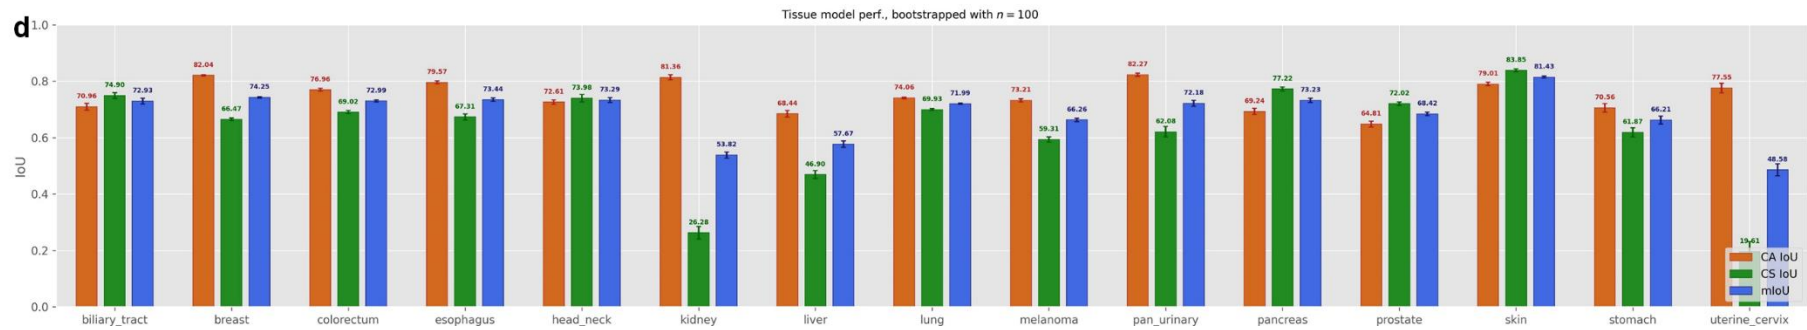

2 **Supplementary Fig. 7.** A bootstrapping evaluation result of deep learning-based tumor infiltrating lymphocyte analyzer on the cell (**a**) and  
3 the tissue (**b**) of breast cancers, lung cancers, and other cancer types. (**c, d**) The cell and tissue model performance of the DL model in the  
4 various cancer types analyzed. The error bars represent 95% confidence intervals. The error bars are 95% confidence intervals.

5

6

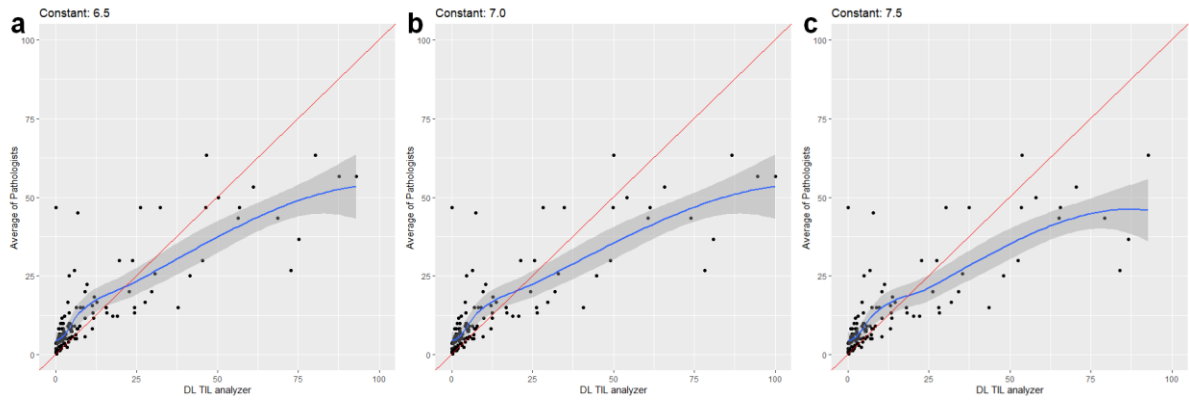

7

8 **Supplementary Fig. 8.** Correlation between the deep learning (DL)-based tumor infiltrating  
9 lymphocyte (TIL) analyzer and the average stromal TIL of pathologists according to  
10 variations in constant  $\alpha$  value (**a**: Constant 6.5, **b**: Constant 7.0, **c**: Constant 7.5).

11

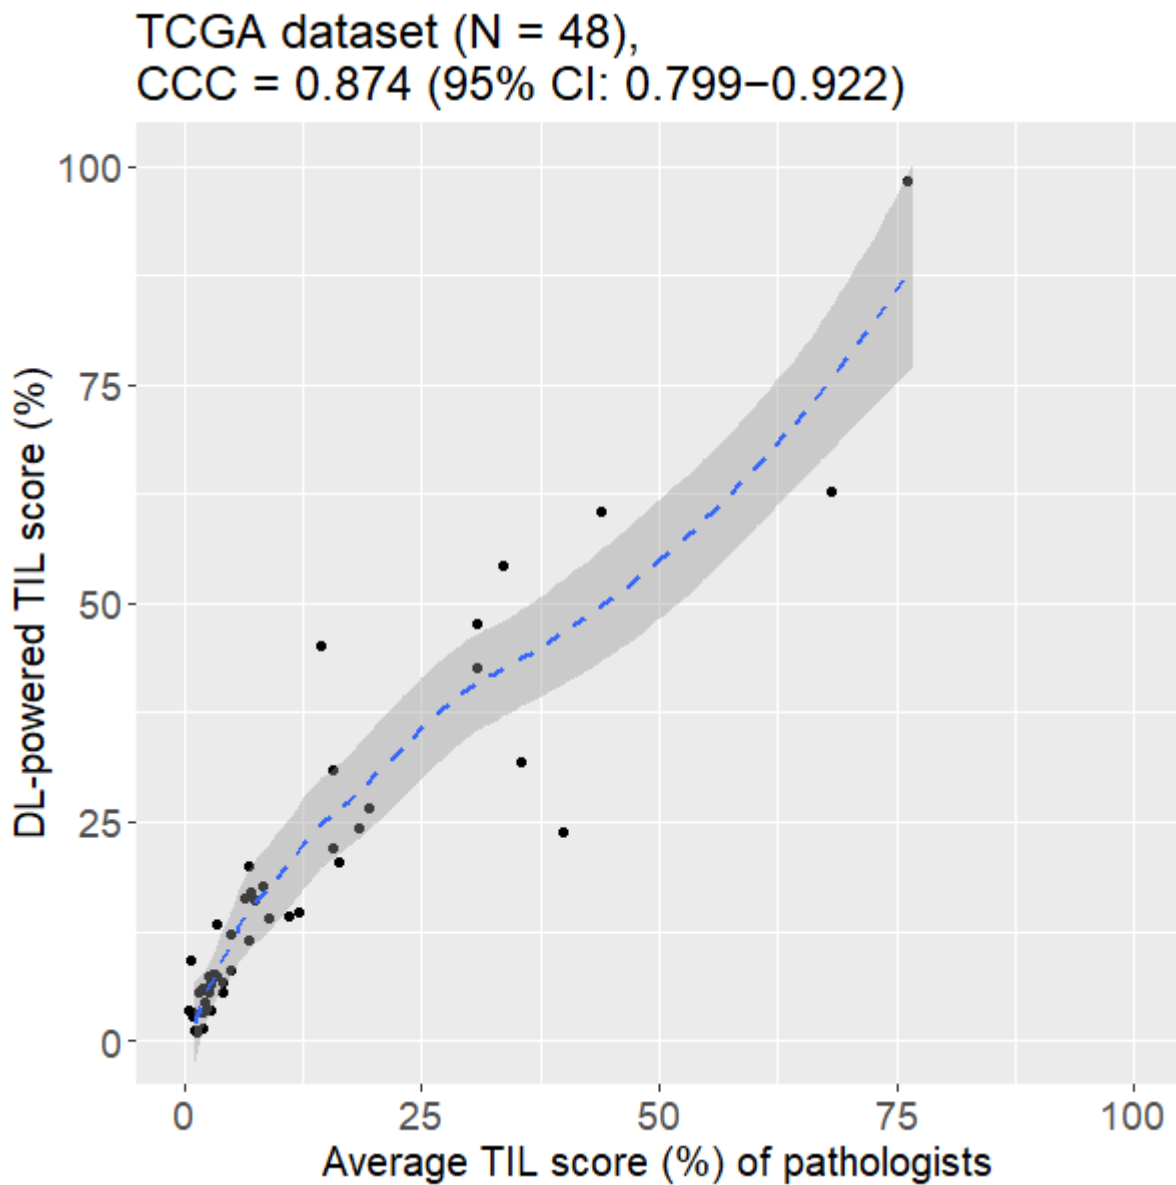

12

13 **Supplementary Fig. 9.** Correlation between the deep learning (DL)-based tumor infiltrating  
 14 lymphocyte (TIL) analyzer and the average stromal TIL of pathologists in TCGA validation  
 15 dataset ( $N = 48$ ), measured by concordance correlation coefficient (CCC).
